# Supplementary material for: Postoperative pain treatment after total knee arthroplasty: A systematic review
Source: PubMed Central journal article supplement (PMC5342240; doi:10.1371/journal.pone.0173107), 2017-03-08

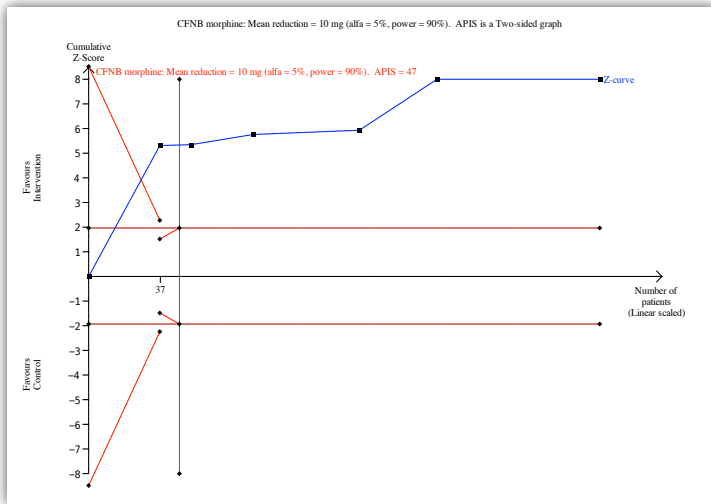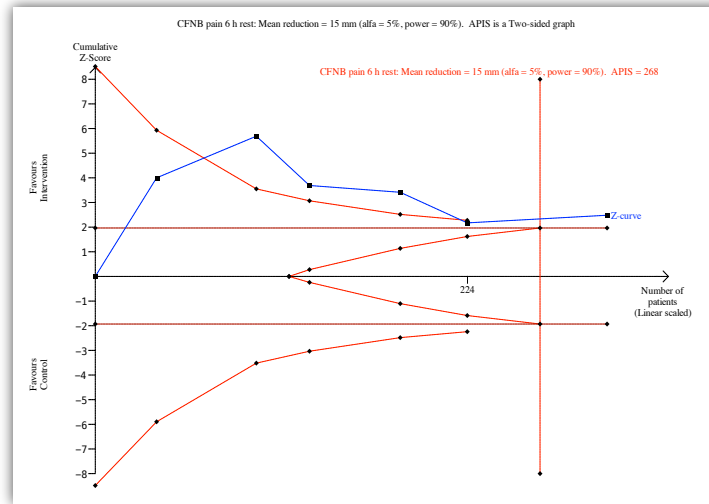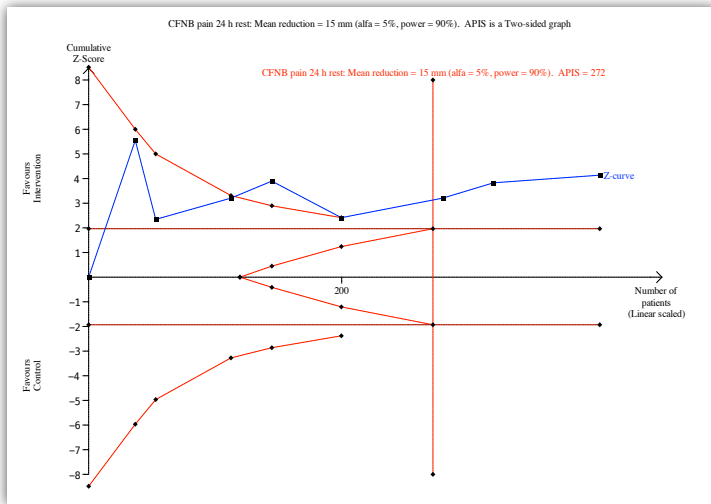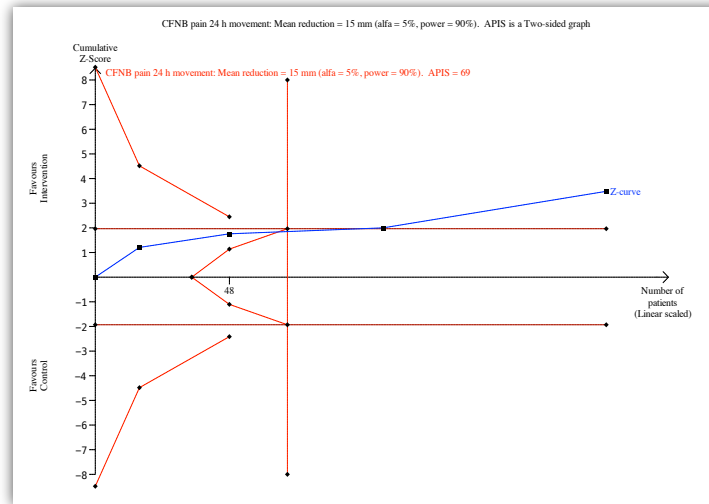

Supplement: pone.0173107.s015.pdf [file pone.0173107.s015.pdf]
